# Supplementary material
Source: PubMed Central journal article supplement (PMC3149155)
Supplement: supp_WNL.0b013e318228bee2_Figure_e-1.pdf [file supp_WNL.0b013e318228bee2_Figure_e-1.pdf]

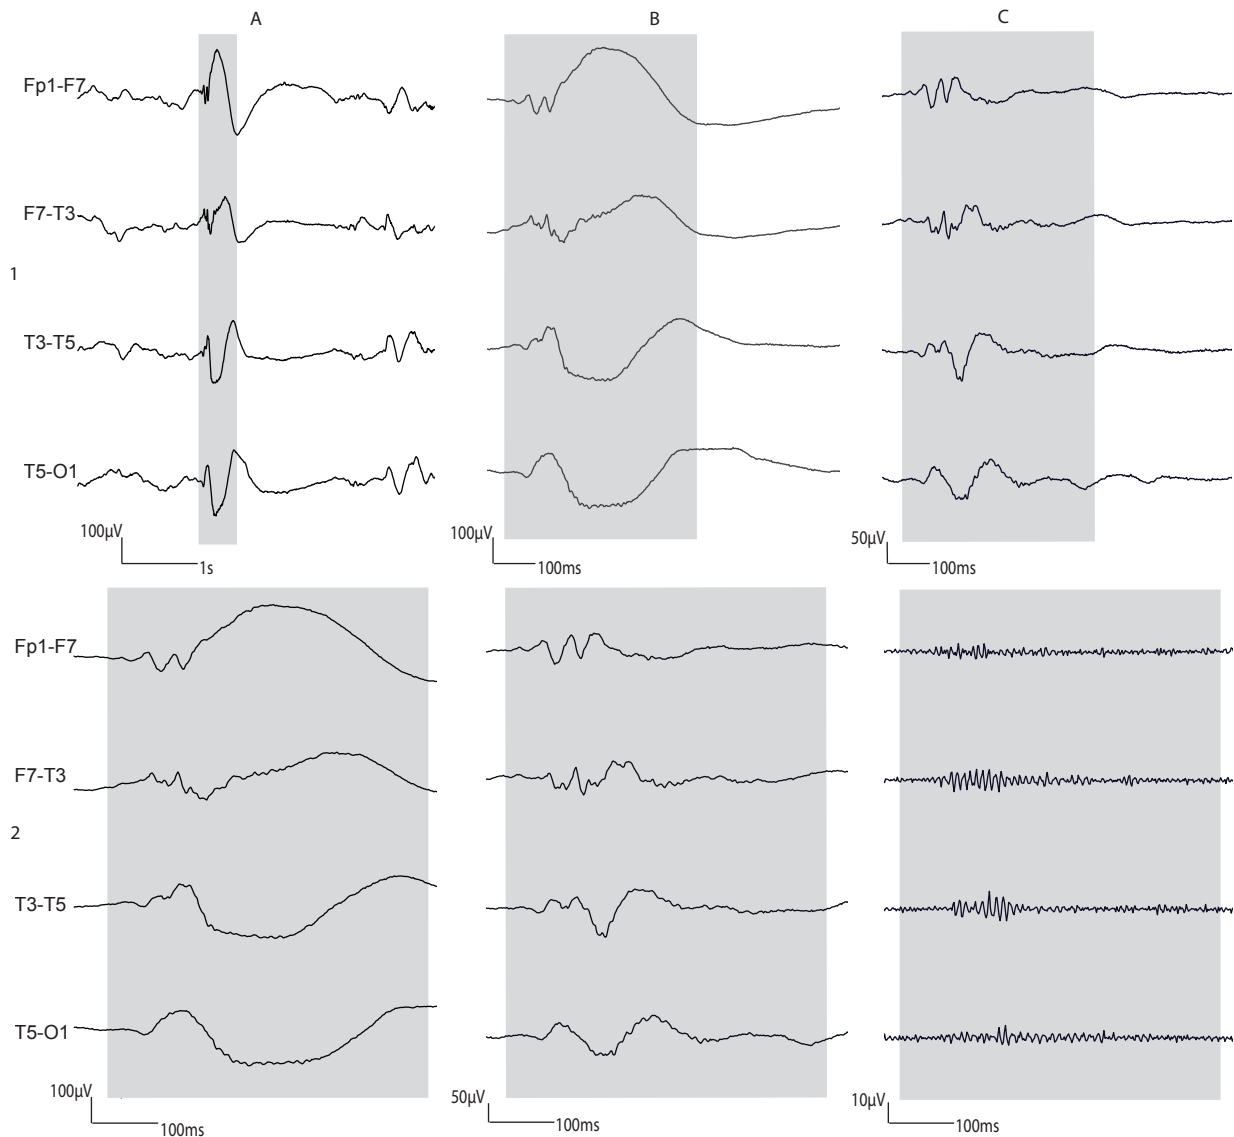

Figure e-1. Examples of ripples co-occurring with spikes.

(1A) Interictal spike in raw EEG. (1B) Ripple oscillations visible without filtering with time scale 150 mm/sec. (1C) Ripple oscillations visible with high pass filter at 5Hz and time scale 150 mm/sec. (2A) Ripple oscillations visible without filtering with time scale 250 mm/sec. (2B) Ripple oscillations visible with high pass filter at 5Hz and time scale 250 mm/sec. (2C) Ripple oscillations visible with high pass filter at 80 Hz and time scale 250 mm/sec.
